# Supplementary material for: Sodium borohydride-nickel chloride hexahydrate in EtOH/PEG-400 as an efficient and recyclable catalytic system for the reduction of alkenes
Source: Royal Society of Chemistry journal article supplement (doi:10.1039/c8ra00905h), 2018-01-01

## *Electronic Supplementary Information (ESI) for*

### **Sodium Borohydride-Nickel Chloride Hexahydrate in EtOH/PEG-400 as an Efficient and Recyclable Catalytic System for the Reduction of Alkenes**

Kaoxue Li\*, Chuanchao Liu, Kang Wang, Yang Ren, Fahui Li \*

*Chemistry & Chemical and Environmental Engineering College, Weifang University, Weifang*

*261061, PR China.*

#### **1. Materials and analyses**

NiCl<sub>2</sub>·6H<sub>2</sub>O, PEG-400 were purchased from Alfa Aesar. Alkenes and solvents were from Aladdin. Unless otherwise noted, all chemicals were analytical reagents without further purification. UV-vis measurement was acquired using a UV/Vis spectrophotometer. The HRTEM image was taken with a JEM2100F TEM at an accelerating voltage of 200 kV. XPS analysis was performed on a Thermo VG ESCALAB 250 Microprobe instrument using Al K $\alpha$  radiation as the X-ray source. The binding energy of the element was calibrated using a C 1s photoelectron peak at 284.6 eV. ICP-AES analyses of Ni leaching were carried out on Optima 2000DV (Thermo Elemental, USA). GC analyses were performed on Persee GC1100 instrument equipped with a 50 m  $\times$  0.25 mm OV-101 column and a FID detector. GC-MS were acquired using Persee MT-80EI with a 50 m  $\times$  0.25 mm HP-5MS column (He as a carrier gas)

#### **2 General procedures for the reduction of alkenes catalyzed by in situ generated Ni NPs**

In a typical experiment, a solution of alkene (5 mmol) and NiCl<sub>2</sub>·6H<sub>2</sub>O (0.25 mmol) in the mixture of anhydrous ethanol and PEG-400 (5 mL, volume ratio 3:2) was added NaBH<sub>4</sub> (95 mg, 2.5 mmol) under N<sub>2</sub> atmosphere, the flask was immediately sealed and stirred at 30 °C for a certain time. After reaction, the result mixture was extracted with 5 mL *n*-heptane or

petroleum ether. The upper phase was separated by decantation and analyzed by GC and GC-MS.

### 3 Procedure for the reduction of styrene catalyzed by preformed Ni NPs

$\text{NiCl}_2 \cdot 6\text{H}_2\text{O}$  (0.25 mmol) was dissolved in the mixture of anhydrous ethanol and PEG-400 (5 mL, volume ratio 3:2) under  $\text{N}_2$  atmosphere,  $\text{NaBH}_4$  was added (10 mg, 0.26 mmol) and then the color of solution turned to black immediately, suggesting the formation of Ni nanoparticles. Styrene (5 mmol) and  $\text{NaBH}_4$  (85 mg, 2.24 mmol) were added to the reaction mixture. The flask was immediately sealed and stirred at 30 °C for a certain time. After reaction, the result mixture was extracted with 5 mL *n*-heptane, and the yield of ethylbenzene was determined by GC and GC-MS analysis.

### 4 GC-MS data for hydrogenated products

Ethylbenzene( $\text{C}_8\text{H}_{10}$ ),  $t_r = 8.119$  min

Molecular Weight: 106.16

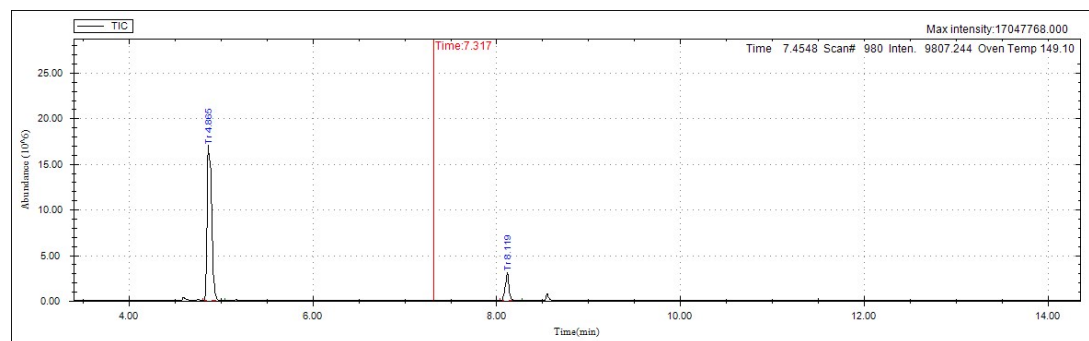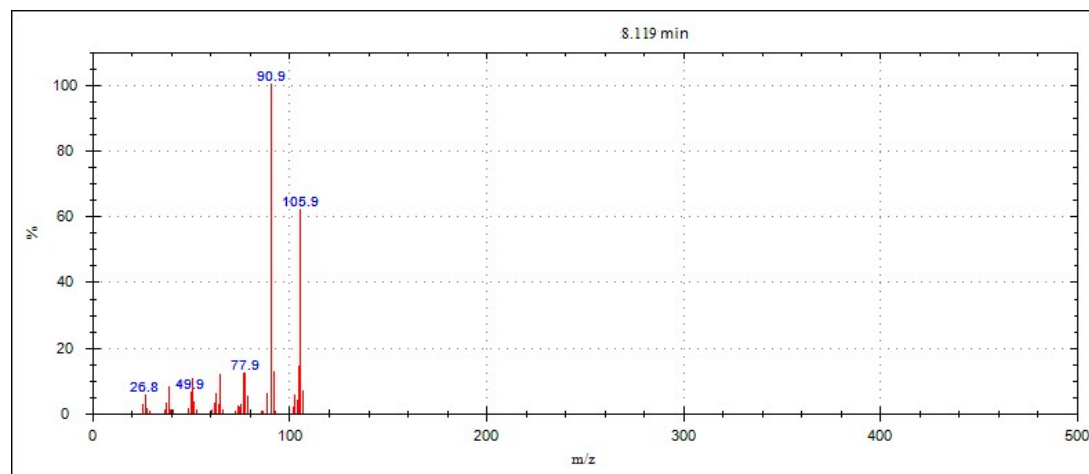

1- Hexane (C<sub>6</sub>H<sub>14</sub>), t<sub>r</sub> = 4.940 min

Molecular Weight: 86.18

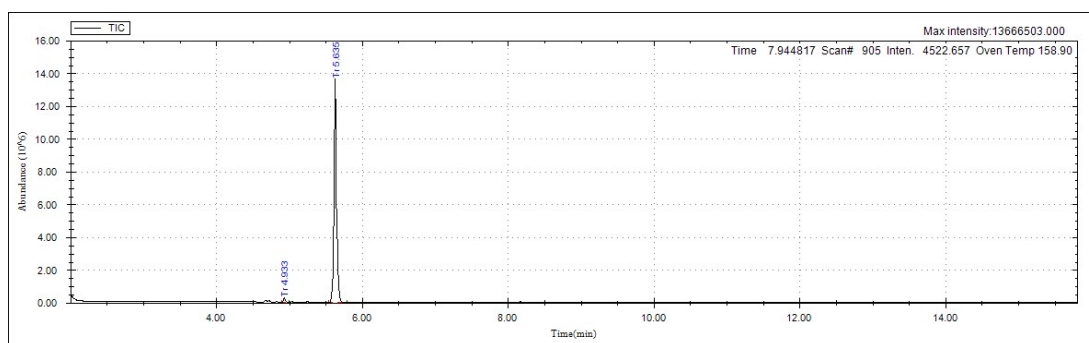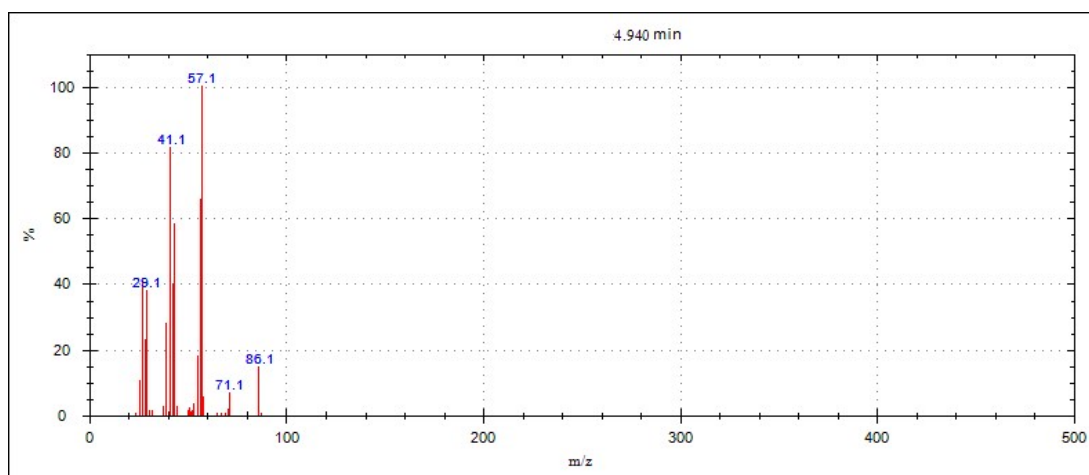

1-Octane (C<sub>8</sub>H<sub>18</sub>), t<sub>r</sub> = 6.916 min

Molecular Weight: 114.23

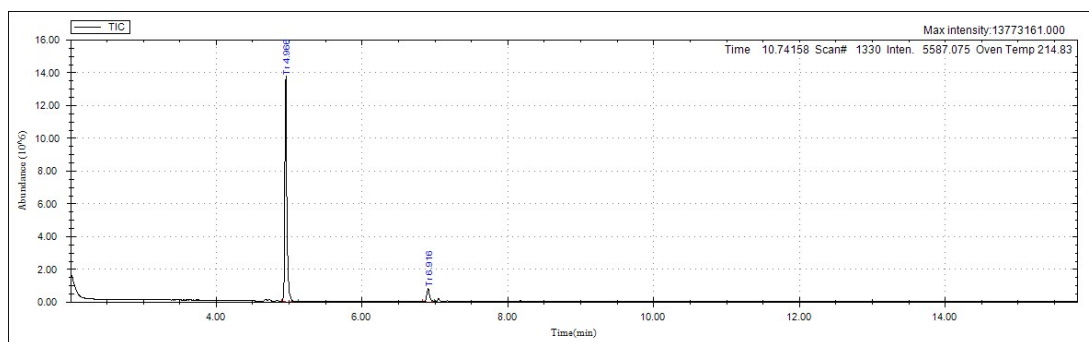

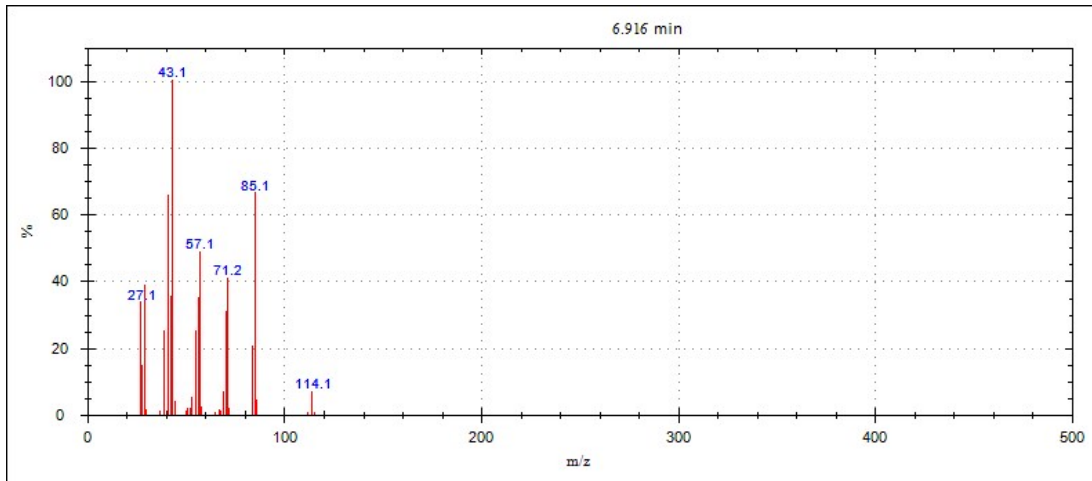

Decane (C<sub>10</sub>H<sub>22</sub>), t<sub>r</sub> = 8.957 min  
 Molecular Weight: 142.29

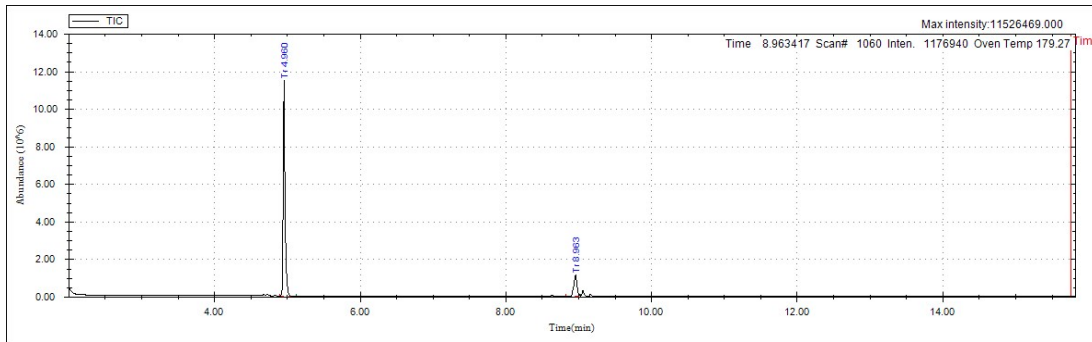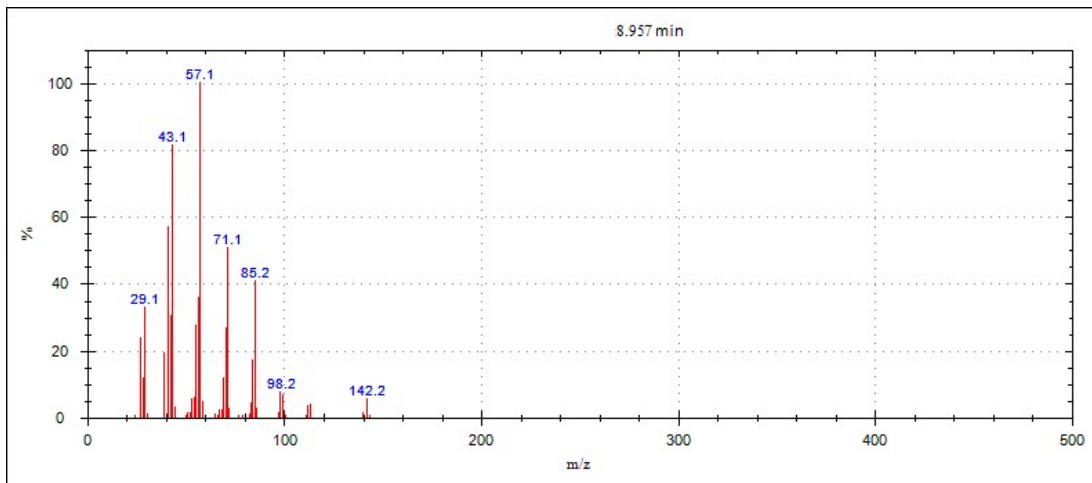

n-Dodecane(C<sub>12</sub>H<sub>26</sub>), t<sub>r</sub> = 10.590min  
 Molecular Weight: 170.33

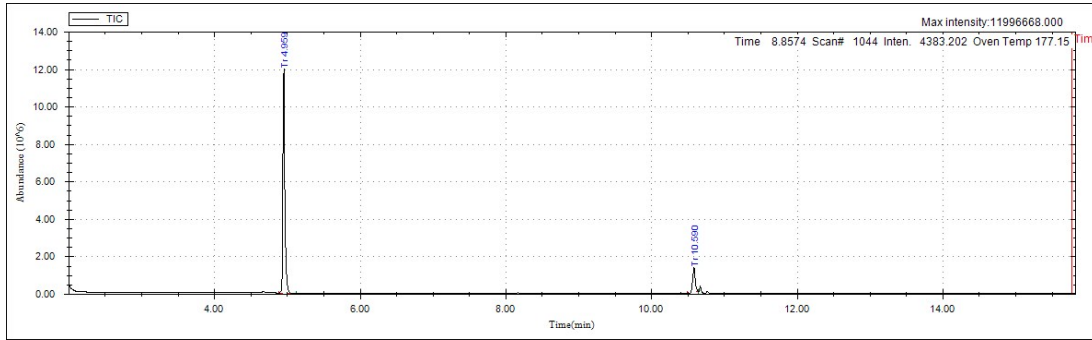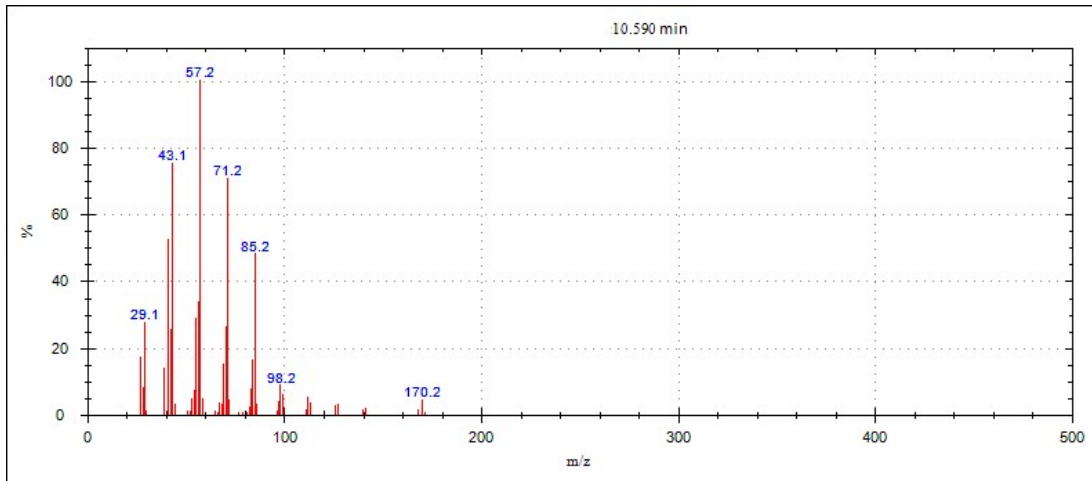

*p*-Ethyltoluene( $C_{12}H_{26}$ ),  $t_r = 10.174$ min  
Molecular Weight: 120.19

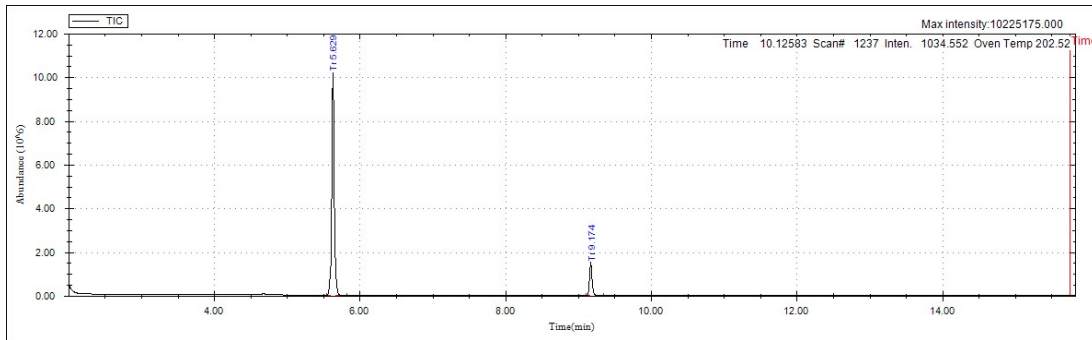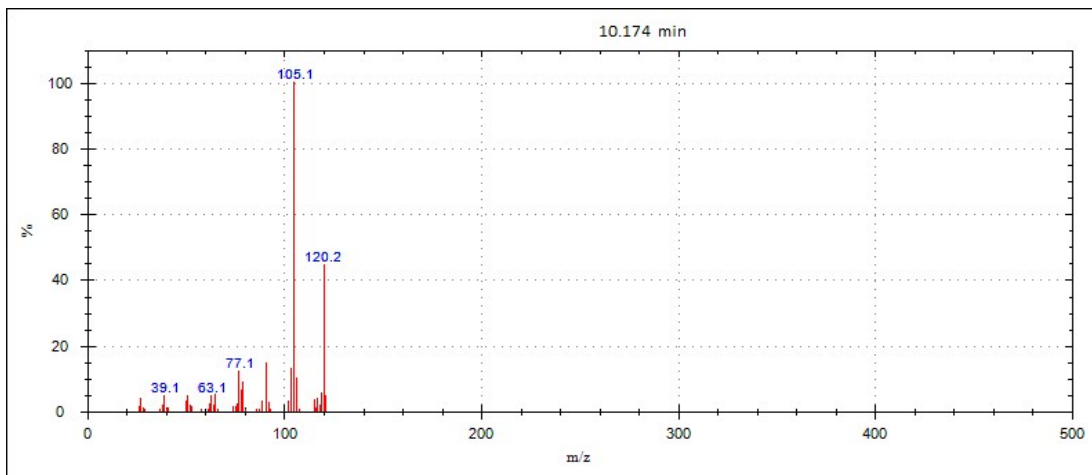

Norbornane(C<sub>7</sub>H<sub>12</sub>), t<sub>r</sub>=6.633min

Molecular Weight: 96.17

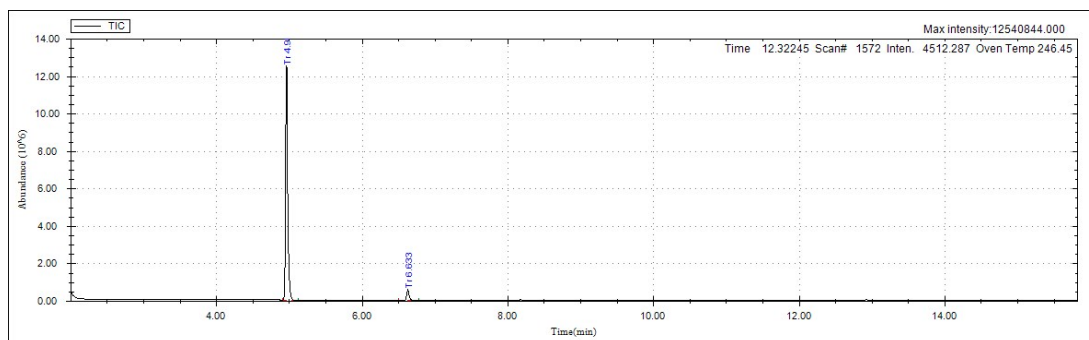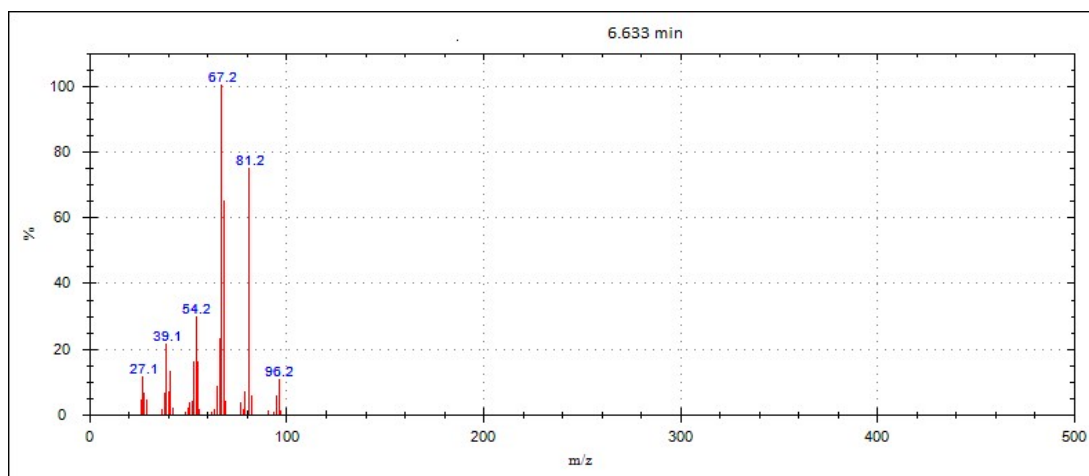

Phenyl propyl ether(C<sub>9</sub>H<sub>12</sub>O), t<sub>r</sub>=10.326min

Molecular Weight: 136.19

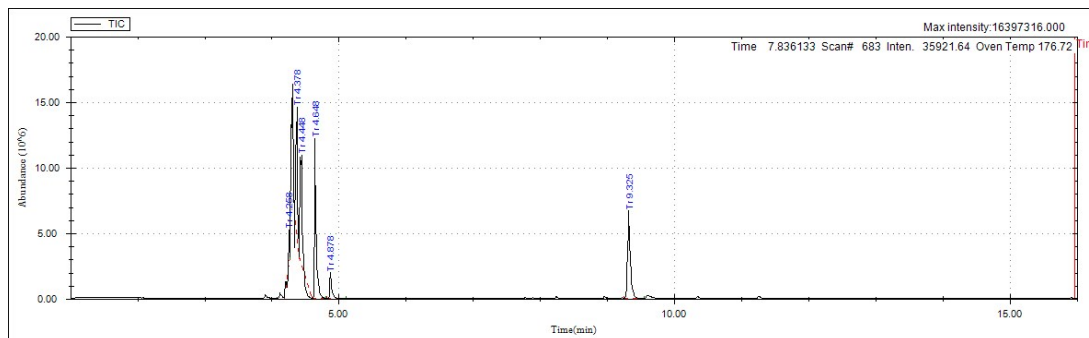

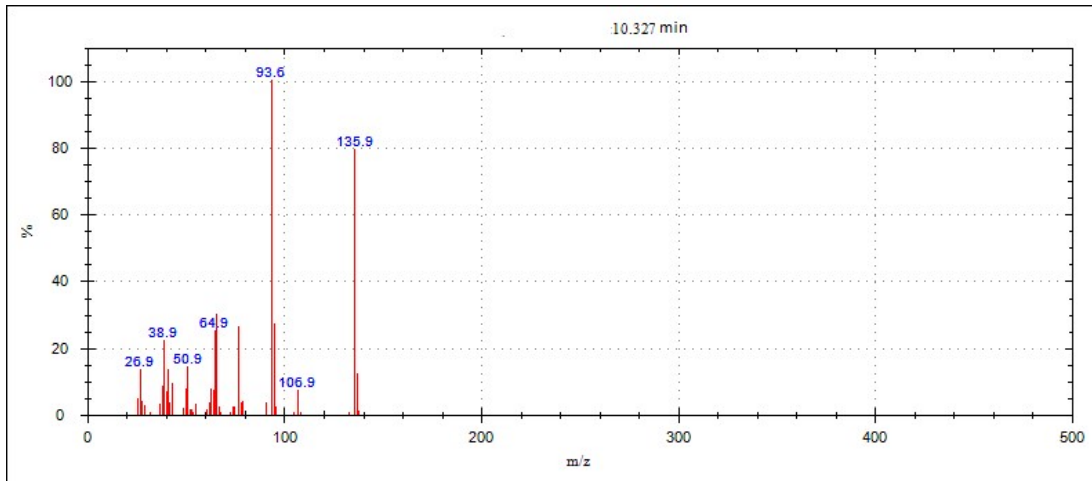

p-Propyl anisole( $C_{10}H_{14}O$ ),  $t_r=11.286$ min  
Molecular Weight: 150.24

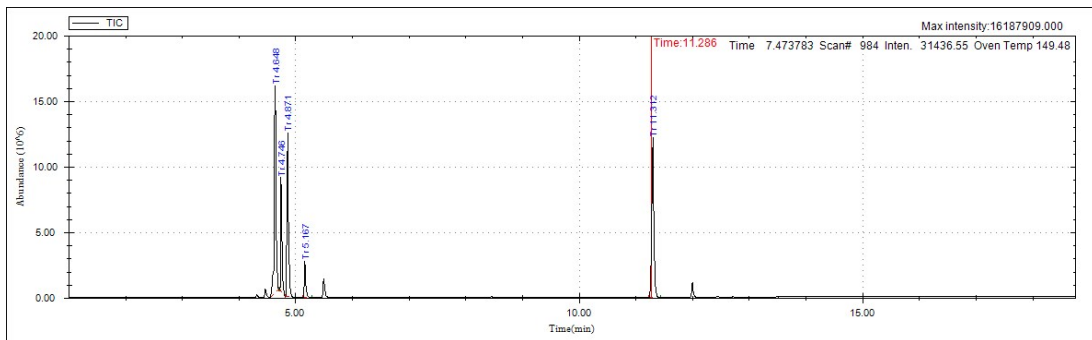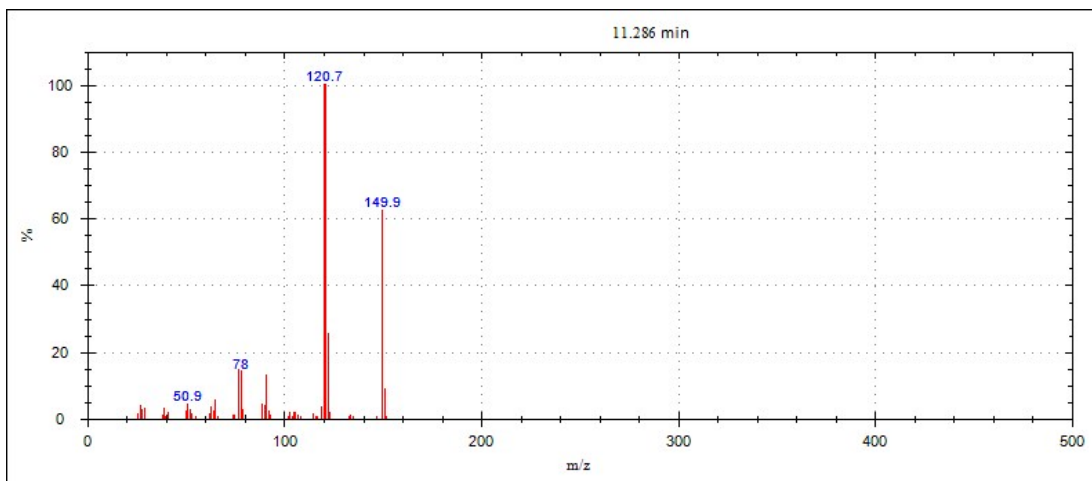

Cyclohexane( $C_6H_{12}$ ),  $t_r=5.597$ min  
Molecular Weight: 84.16

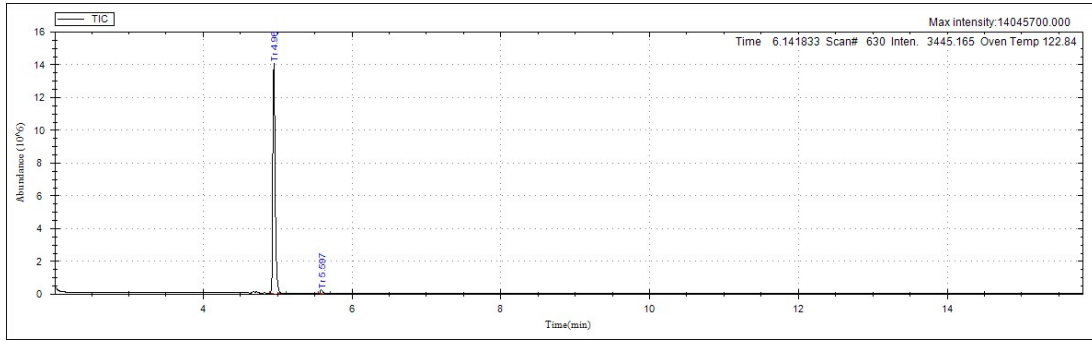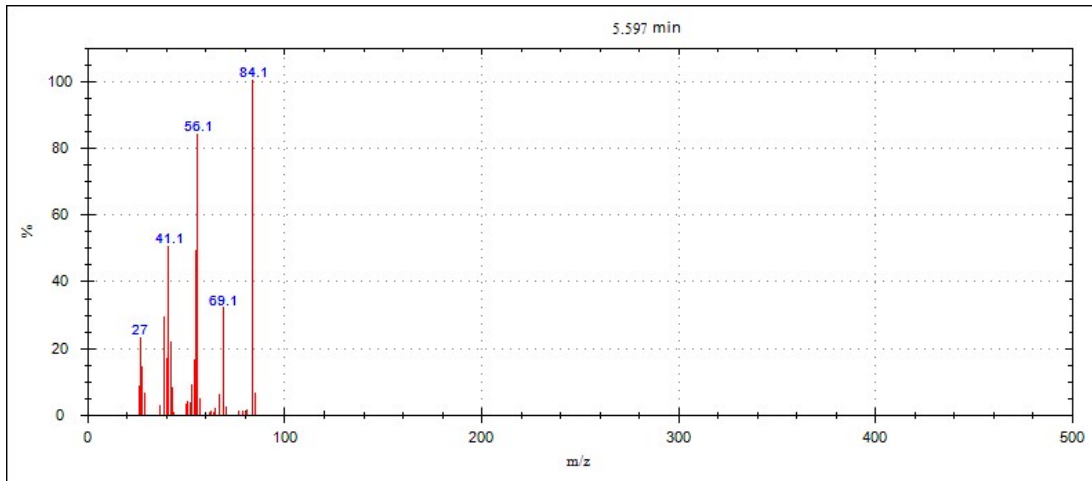

Pinane ( $C_{10}H_{18}$ ),  $t_r = 12.012$  min (product from reduction of  $\alpha$ -pinene)

Molecular Weight: 138.25

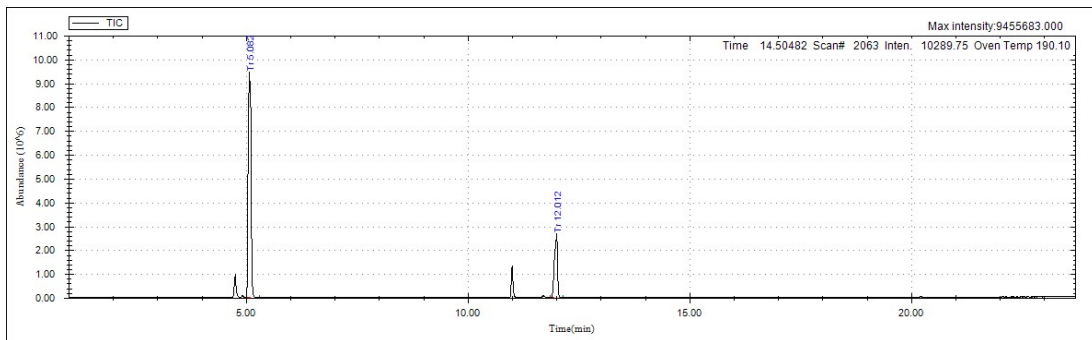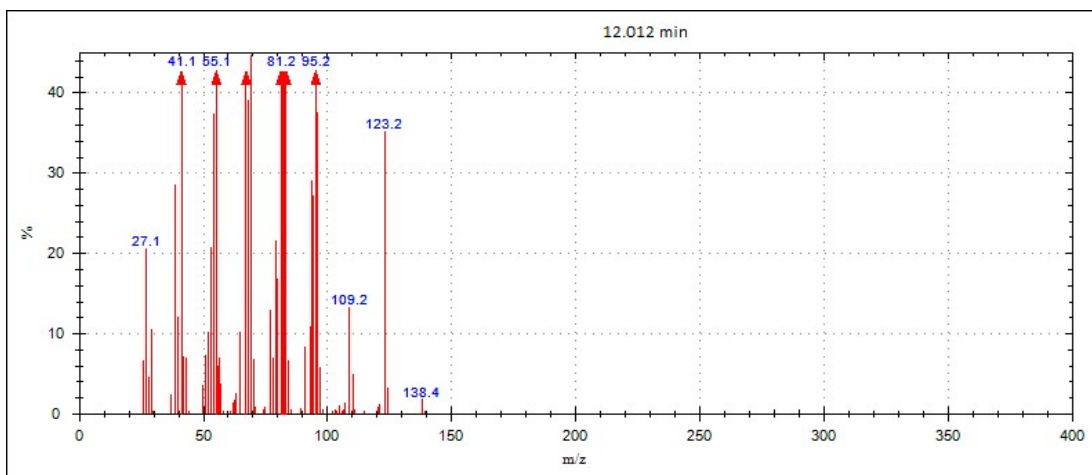



Cyclooctene(C<sub>8</sub>H<sub>14</sub>), t<sub>r</sub>=8.284min, Molecular Weight: 110.20

Cyclooctane(C<sub>8</sub>H<sub>16</sub>), t<sub>r</sub>=8.415min, Molecular Weight: 112.20

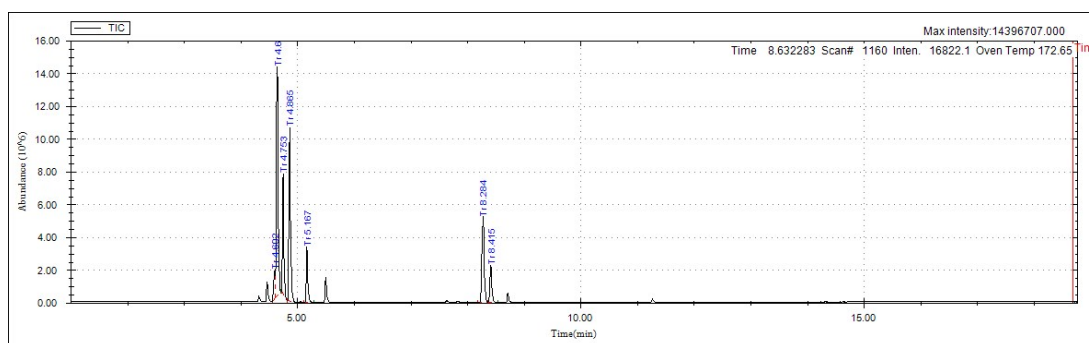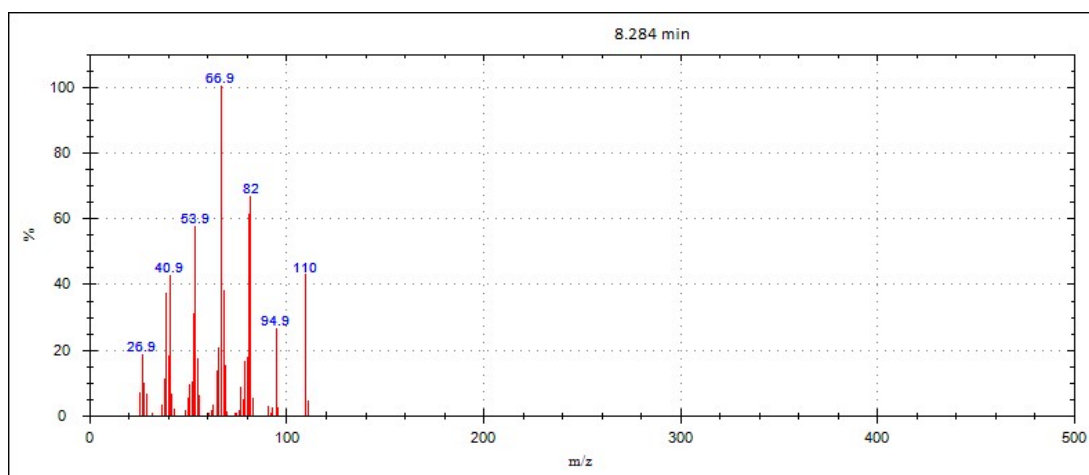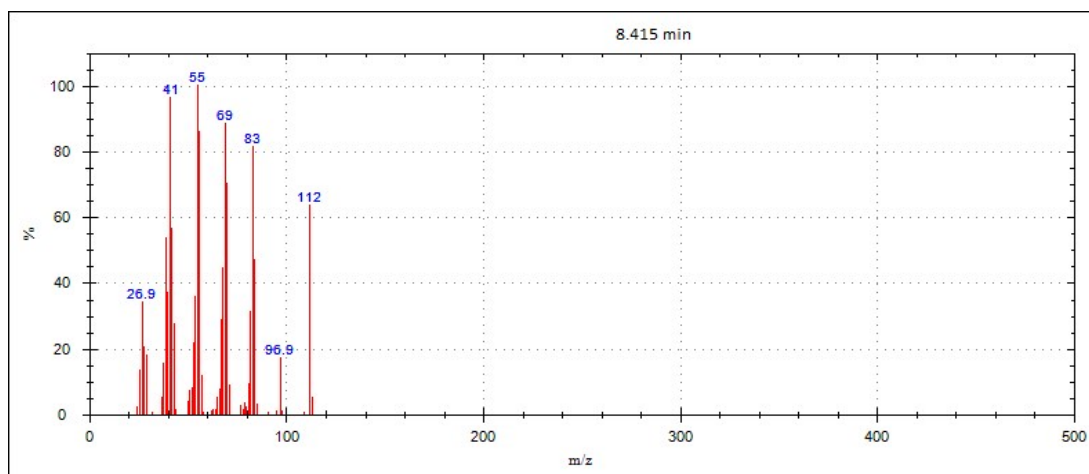

Cyclopentane(C<sub>5</sub>H<sub>10</sub>), t<sub>r</sub>=4.809min

Molecular Weight: 70.13

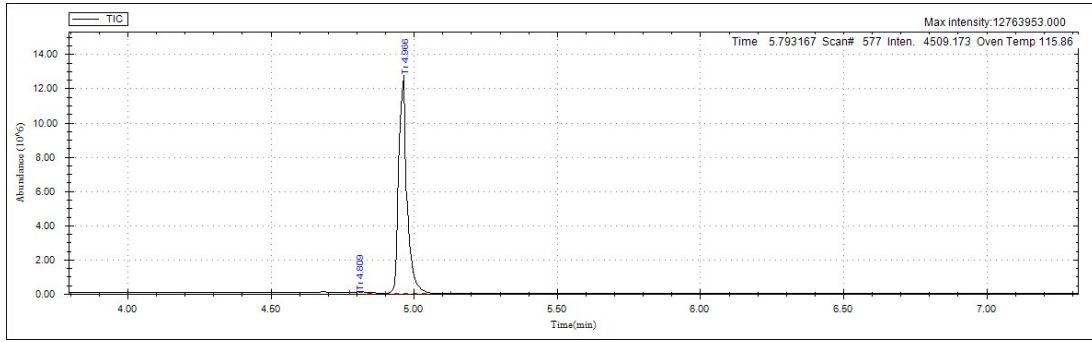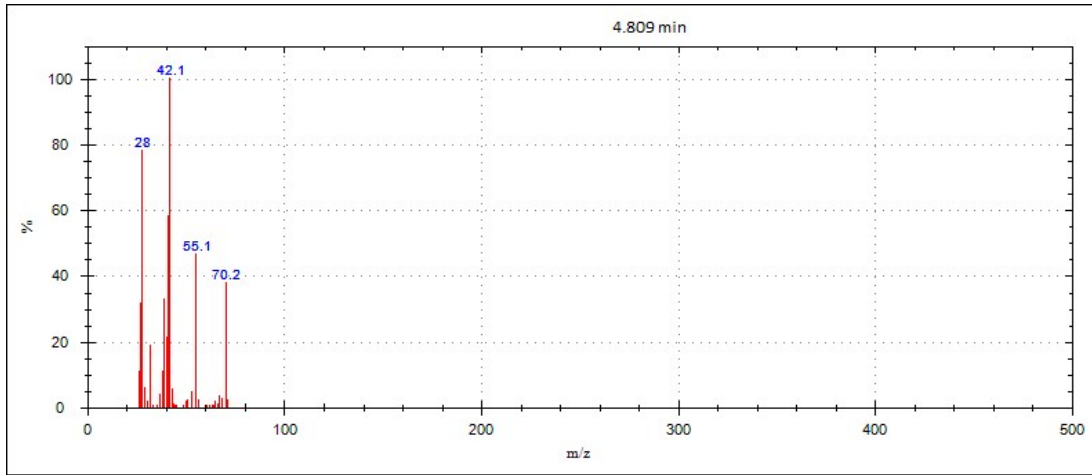

Supplement: c8ra00905h1.pdf [file c8ra00905h1.pdf]
